# Supplementary material for: Screening of Fish Cell Lines for Piscine Orthoreovirus-1 (PRV-1) Amplification: Identification of the Non-Supportive PRV-1 Invitrome
Source: PubMed Central journal article supplement (PMC7601784; doi:10.3390/pathogens9100833), 2020-10-12
Supplement: pathogens-09-00833-s001.pdf [file pathogens-09-00833-s001.pdf]

**Table S1.** PRV-1 RNA levels (Ct values) in Atlantic salmon infected with PRV-1a at PBS-DFO, Nanaimo, B.C. (trial 1) and PRV-1 (unknown subtype) at Elanco Canada, Victoria, P.E.I. (trial 2).

| <b>Atlantic salmon infection trial 1</b> |                |               |           |               |           |
|------------------------------------------|----------------|---------------|-----------|---------------|-----------|
| <b>Week 2</b>                            |                | <b>Week 3</b> |           | <b>Week 4</b> |           |
| <b>Fish</b>                              | <b>Ct</b>      | <b>Fish</b>   | <b>Ct</b> | <b>Fish</b>   | <b>Ct</b> |
| 1                                        | 12.7           | 11            | 17.7      | 21            | 19.1      |
| 2                                        | 13.2           | 12            | 19.3      | 22            | 25.4      |
| 3                                        | 13.0           | 13            | 20.0      | 23            | 14.1      |
| 4                                        | 20.0           | 14            | 16.3      | 24            | 24.4      |
| 5                                        | 22.8           | 15            | 15.6      | 25            | 24.4      |
| 6                                        | 23.8           | 16            | 13.3      | 26            | 23.7      |
| 7                                        | Pooled with #6 | 17            | 15.2      | 27            | 20.3      |
| 8                                        | 14.5           | 18            | 15.2      | 28            | 25.2      |
| 9                                        | 18.7           | 19            | 15.1      | 29            | 19.0      |
| 10                                       | Pooled with #9 | 20            | 13.0      | 30            | 24.4      |

  

| <b>Atlantic salmon infection trial 2</b> |           |               |           |
|------------------------------------------|-----------|---------------|-----------|
| <b>Week 2</b>                            |           | <b>Week 3</b> |           |
| <b>Fish</b>                              | <b>Ct</b> | <b>Fish</b>   | <b>Ct</b> |
| 1                                        | 33.0      | 10            | 19.2      |
| 2                                        | 32.0      | 11            | 24.0      |
| 3                                        | 31.6      | 12            | 28.2      |
| 4                                        | 35.8      | 13            | 23.8      |
| 5                                        | 31.9      | 14            | 25.0      |
| 6                                        | 31.5      | 15            | 21.4      |
| 7                                        | 23.8      | 16            | 24.3      |
| 8                                        | 32.2      | 17            | 23.6      |
| 9                                        | 29.7      | 18            | 32.5      |
